# Supplementary material for: Self-organization of dipyridylcalix[4]pyrrole into a supramolecular cage for dicarboxylates
Source: Royal Society of Chemistry journal article supplement (doi:10.1039/c5ra21335e), 2016-01-01
Supplement: c5ra21335e1.pdf [file c5ra21335e1.pdf]

Electronic Supplementary Information

**Self-organization of dipyridylcalix[4]pyrrole into a supramolecular cage for dicarboxylates**

**Naoaki Kiriya, Masahiro Ebihara, Taro Udagawa and Hidekazu Miyaji\***

*Department of Chemistry and Biomolecular Science, Faculty of Engineering, Gifu University, 1-1 Yanagido, Gifu 501-1193, Japan*  
*miyaji@gifu-u.ac.jp*

**1. Synthesis**

**5-methyl-5-(4-pyridyl)dipyrromethane**

4-acetylpyridine (2.6 ml, 24 mmol) and pyrrole (4.5 ml, 75 mmol) were suspended in water (160 ml) and the mixture was stirred under hydrochloric acid for 1 hour at room temperature. After neutralized with sodium bicarbonate, 5-methyl-5-(4-pyridyl)dipyrromethane was precipitated and dried *in vac*. The residue was further purified by silica column chromatography (1.1 g, 19%). <sup>1</sup>H NMR (500 MHz, CDCl<sub>3</sub>) δ 2.03 (s, 3H, CH<sub>3</sub>), 5.95 (m, 2H, pyrrole-CH), 6.18 (m, 2H, pyrrole-CH), 6.70 (m, 2H, pyrrole-CH), 7.02 (d, 2H, pyridine-CH), 7.82 (s, 2H, pyrrole-NH), 8.50 (d, 2H, pyridine-CH)  
FAB-MS m/z = 238.2 (M+H<sup>+</sup>)

**5,15-dipyridyl-5',10,10',15',20,20'-hexamethylcalix[4]pyrrole (1)**

5-methyl-5-(4-pyridyl)dipyrromethane (300 mg, 1.3 mmol) was dissolved in acetone (500 ml). BF<sub>3</sub>•OEt<sub>2</sub> (0.5 ml, 4.1 mmol) was added to the solution and stirred for 24 h. After neutralized with triethylamine, the solution was concentrated *in vac*. and the mixture of CHCl<sub>3</sub>/water was poured. The organic layer was separated, washed with water, dried *in vac*. the residue was purified by silica column chromatography (eluent; chloroform : ethyl acetate = 1 : 2) (31 mg, 9% (Rf 0.23: *cis*), 84 mg, 24% (Rf 0.33: *trans*)) <sup>1</sup>H NMR (400 MHz, CD<sub>3</sub>CN) δ 1.47 (s, 6H, CH<sub>3</sub>), 1.62 (s, 12H, CH<sub>3</sub>), 5.62 (d, 4H, pyrrole-CH), 5.84 (d, 4H, pyrrole-CH), 6.82 (d, 4H, pyridine-CH), 7.82 (s, 4H, NH), 8.38 (d, 4H, pyridine-CH). ESI-MS m/z = 555.1120 (M+H<sup>+</sup>)

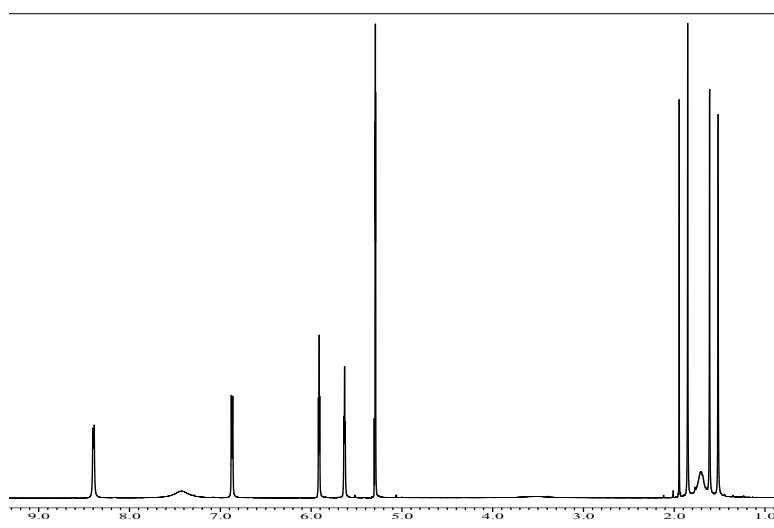

Fig.S1 <sup>1</sup>H NMR spectrum of *cis*-1 (400 MHz, CD<sub>2</sub>Cl<sub>2</sub>).

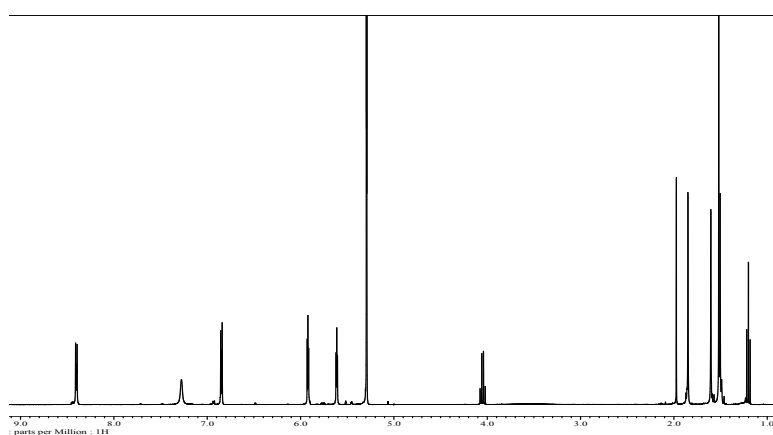

Fig.S2 <sup>1</sup>H NMR spectrum of *trans*-1 (400 MHz, CD<sub>2</sub>Cl<sub>2</sub>).

**The cage (2) of 5,15-dipyridyl-5',10,10',15',20,20'-hexamethylcalix[4]pyrrole**

*Cis*-5,15-dipyridyl-5',10,10',15',20,20'-hexamethylcalix[4]pyrrole **1** (7.2 mg, 0.013 mmol) was dissolved in CH<sub>2</sub>Cl<sub>2</sub> and Pd(II)(OTf)<sub>2</sub>(PEt<sub>3</sub>)<sub>2</sub> (8.3 mg, 0.013 mmol) was added into the solution. The mixture was stirred at room temperature for 1 h. The solution was concentrated and dried *in vac*. <sup>1</sup>H NMR (400 MHz, CD<sub>3</sub>CN) δ 1.18 (m, 36H, ethyl-CH<sub>3</sub>), 1.49 (s, 12H, CH<sub>3</sub>), 1.63 (s, 24H, CH<sub>3</sub>), 1.98 (m, 24H, P-CH<sub>2</sub>), 5.34 (d, 8H, pyrrole-CH), 5.93 (d, 8H, pyrrole-CH), 7.02 (d, 8H, pyridine-CH), 7.68 (s, 8H, NH), 8.55 (d, 4H, pyridine-CH) ESI-MS m/z = 2393.47 (M+H<sup>+</sup>)

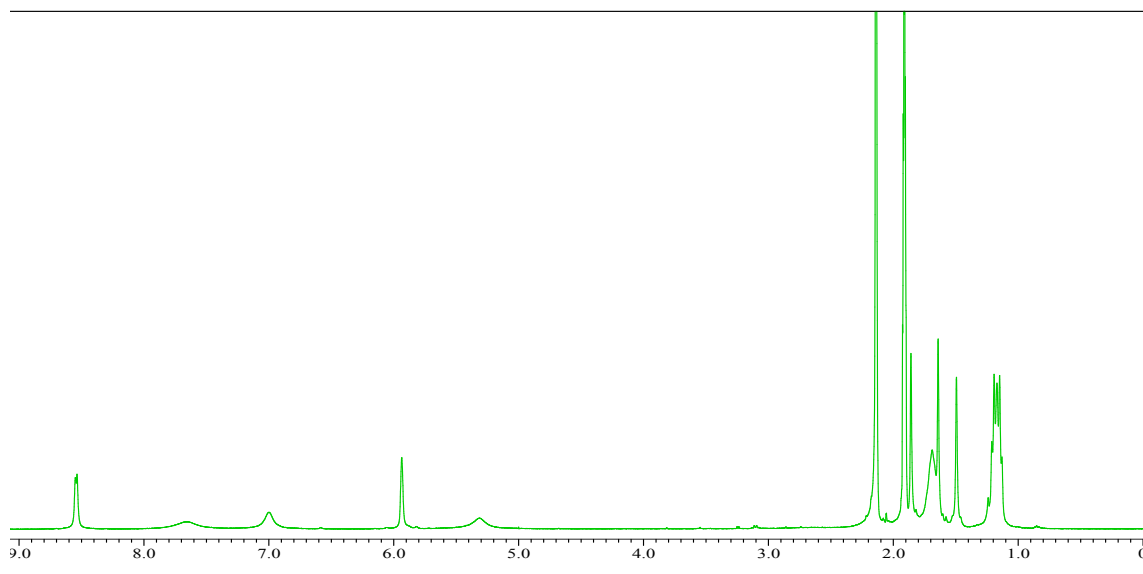

Fig.S3 <sup>1</sup>H NMR spectrum of cage molecule **2** (400 MHz, CD<sub>3</sub>CN).

## 2. $^1\text{H}$ NMR titration experiments

The cage (**2**) of 5,15-dipyridyl-5',10,10',15',20,20'-hexamethylcalix[4]pyrrole was dissolved in an NMR tube (2.0 mM, acetonitrile- $d_3$  (500  $\mu\text{l}$ )). To the solution, aliquots of  $(\text{TBA})_2$  suberate (0.1, 0.2, 0.3, 0.4, 0.5, 0.6, 0.7, 0.8, 0.9, 1.0, 1.1, 1.3, 1.5, 1.7, 2.0 equiv.) were added with a microsyringe, and those  $^1\text{H}$  NMR spectra were observed.

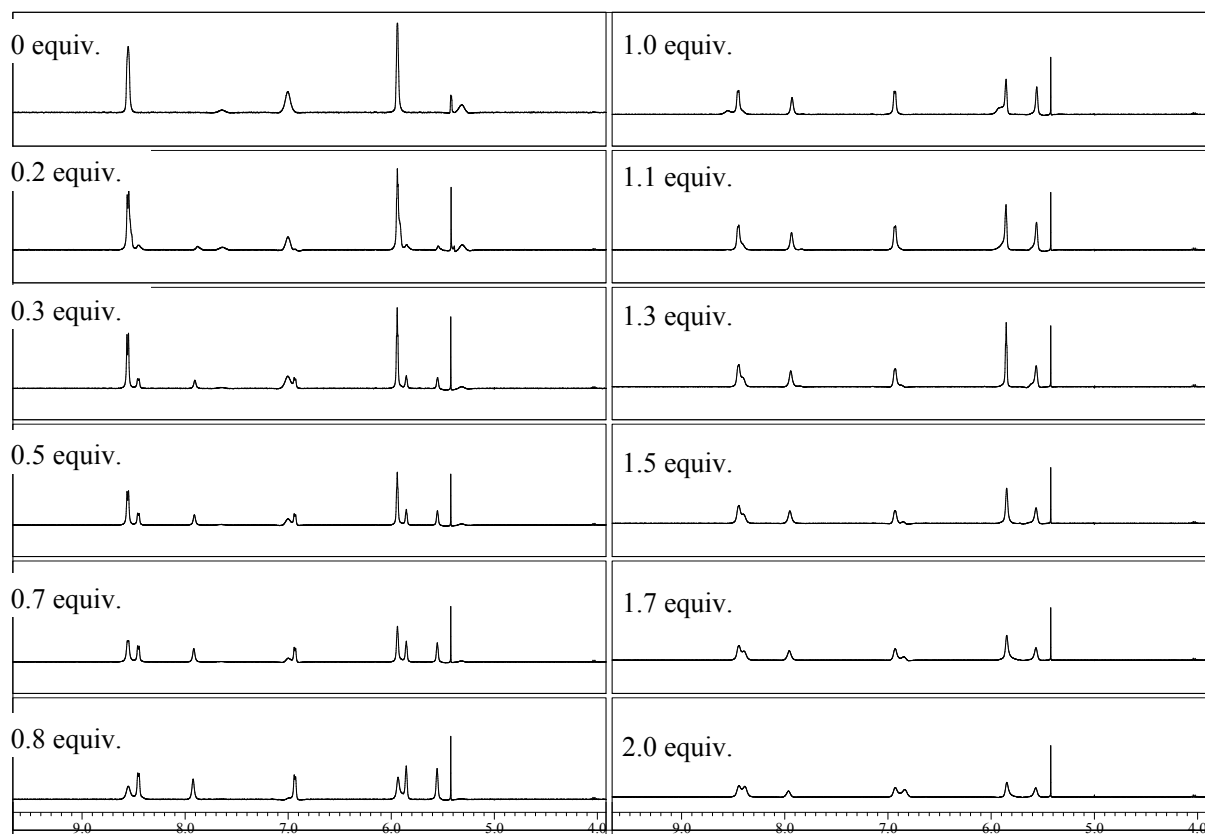

Fig. S4  $^1\text{H}$  NMR titration experiments of **2** with suberate (400 MHz,  $\text{CD}_3\text{CN}$ ).

Pimelate, azelate, and acetate (TBA salts) were also added by the similar method, and  $^1\text{H}$  NMR spectra of those complexes were observed.

### 3. Job plots

Stock solutions of the host **2** (1.0 mM) and  $(\text{TBA})_2$  azelate (1.0 mM) were prepared separately in acetonitrile- $d_3$ .  $^1\text{H}$  NMR spectrum (600 MHz) was taken for each of 10 different solutions containing a total of 500  $\mu\text{L}$  of the host **2** and  $(\text{TBA})_2$  azelate in an NMR tube in the following ratios: 50:450, 100:400, 150:350, 200:300, 250:250, 300:200, 350:150, 400:100, 450:50, 500:0. At the peak of pyridine moiety, three new peaks appeared by adding azelate (Fig.S5). As three types of complex (complex A, complex B, complex C) were considered, Job plots were constructed from the integration ratio of the each complex peak. Job plots were plotted as [complex A] against mole fraction of host, [complex B] against mole fraction of host, [complex C] against mole fraction of host, and [total complex] against mole fraction of host. From the results of Job plot, 2: 1 (host: guest) component (A), 1: 1 (host: guest) component (B), and 1: 3 (host: guest) component (C) have been suggested (Fig.S6). Since Job's plot from total complex gave a peak at 0.7, we concluded that 2: 1 component (A) mainly existed in case of azelate.

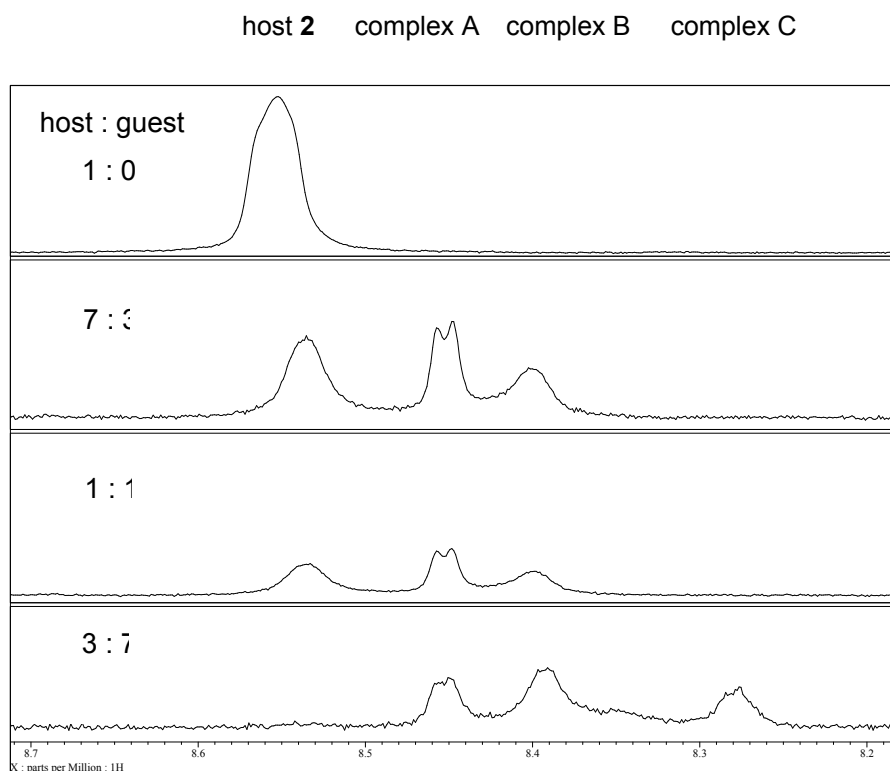

Fig. S5  $^1\text{H}$  NMR spectra of the pyridine moiety of host **2** with azelate (600MHz,  $\text{CD}_3\text{CN}$ ).

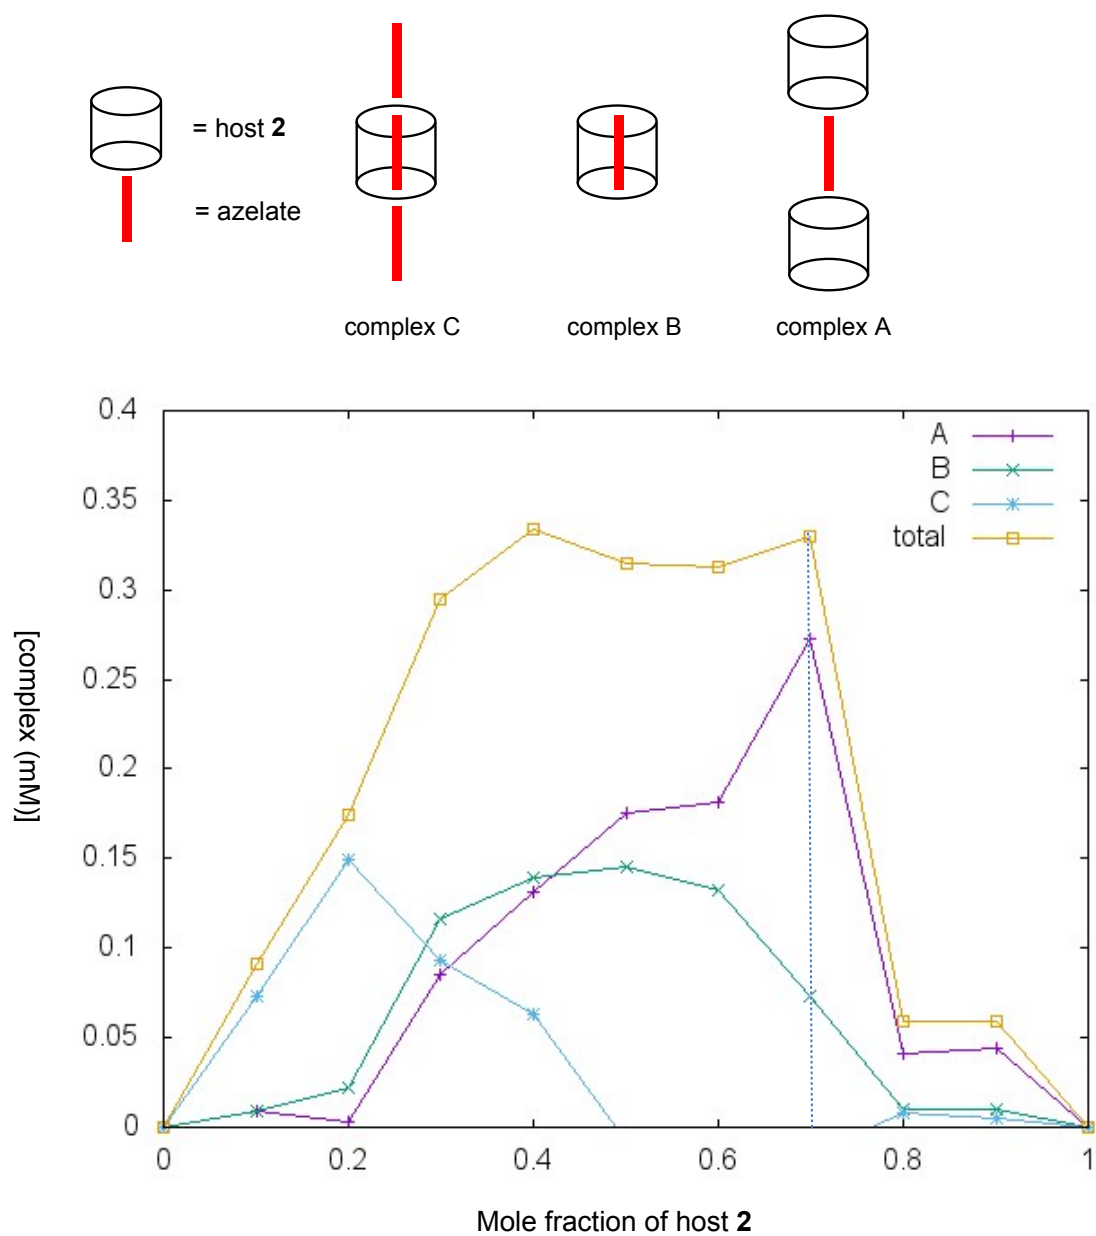

Fig. S6 Job plot and the suggested complexes for the interaction between host 2 and azelate in CD<sub>3</sub>CN. The peak value at 0.7 shows 2:1 (host:guest) binding stoichiometry.

Job plot of host **2** and suberate was also checked in the same method. Similar three new peaks appeared by adding (TBA)<sub>2</sub> suberate (Fig.S7). Compared to azelate, Job plot of suberate showed a larger 1: 1 component (B) and a smaller 2: 1 component (A) than that of azelate. Job plot of the total complex gave a peak at 0.5 (Fig.S8). We concluded that suberate was mainly bound to the inside host by 1: 1 (host: guest) stoichiometry. The binding seemed to be stronger than azelate because the peak of free host almost disappeared at 1 equivalent of suberate. When the guest is greater than 1 equivalent, we found that the peak of complex B gradually shifted to upfield and gave the similar peak of complex C (1: 3 component). It seemed to occur a fast exchange of equilibrium between complex B and complex C because of the hydrogen bonds of extra suberate to NH protons of two calixpyrroles of host **2** from outside.

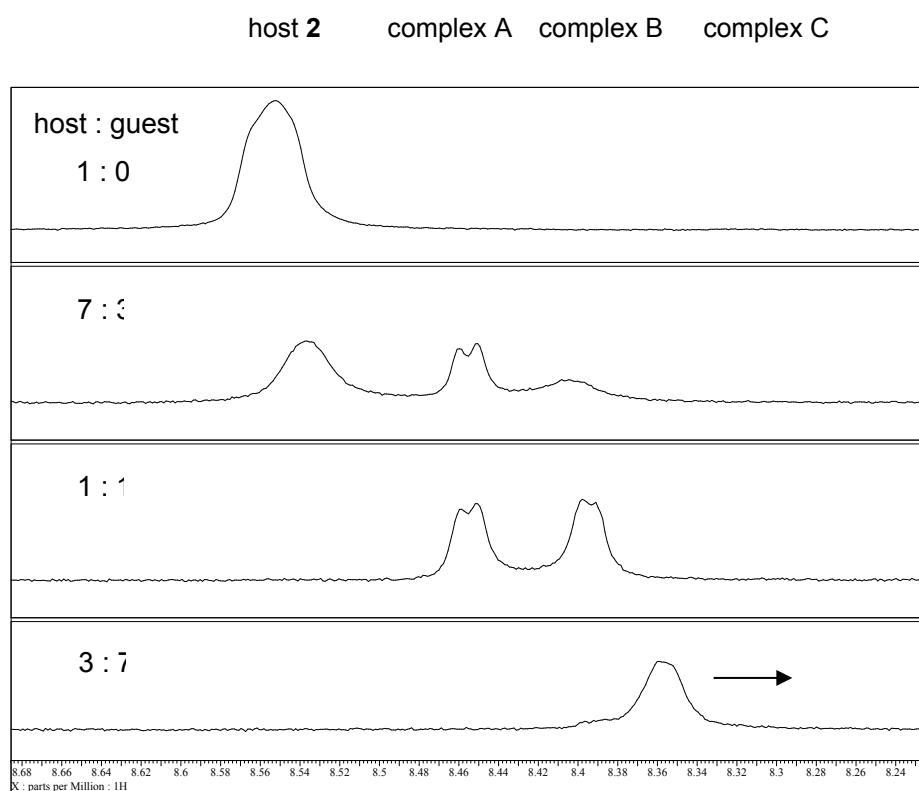

Fig. S7 <sup>1</sup>H NMR spectra of the pyridine moiety of host **2** with suberate (600MHz, CD<sub>3</sub>CN).

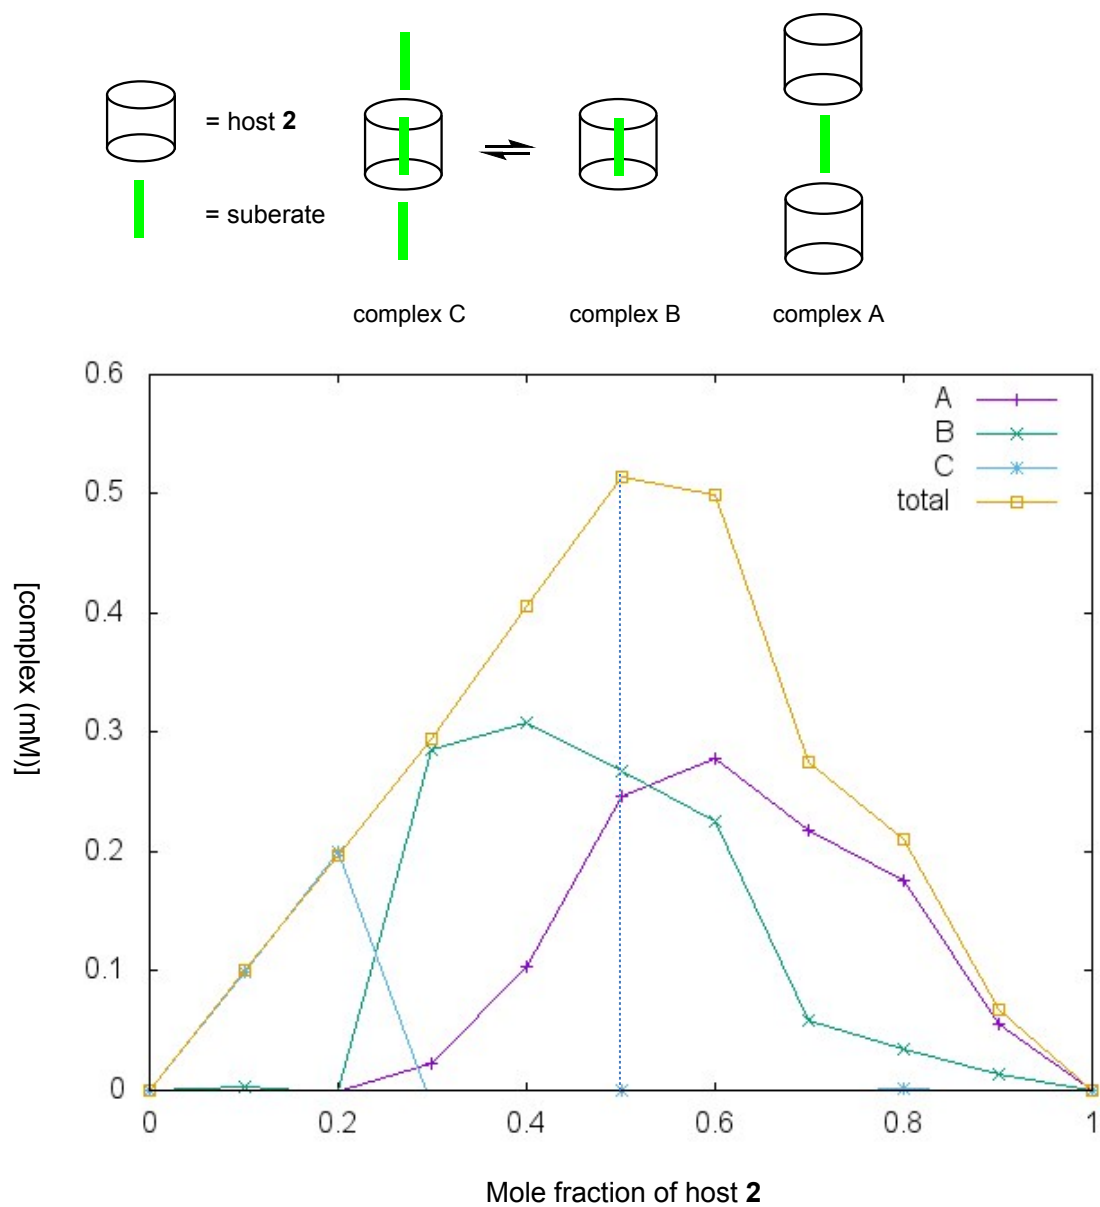

Fig. S8 Job plot and the suggested complexes for the interaction between host 2 and suberate in  $CD_3CN$ . The peak value at 0.5 shows 1:1 (host:guest) binding stoichiometry.



#### 4. Electron spray ionization (ESI) mass spectra

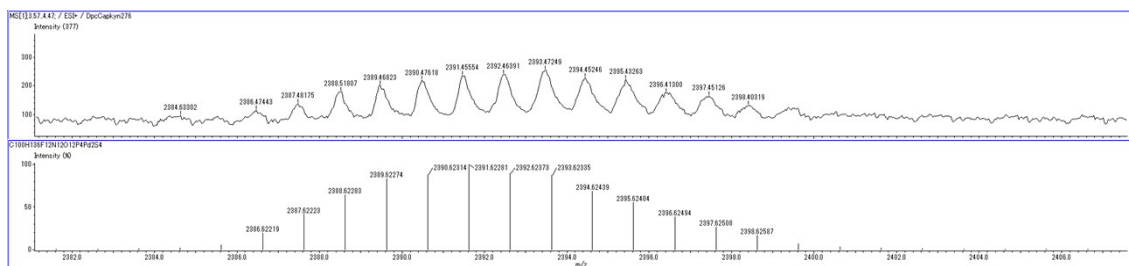

Fig. S9 ESI mass spectrum of cage 2 (up: obtained, down: calculated isotope pattern).

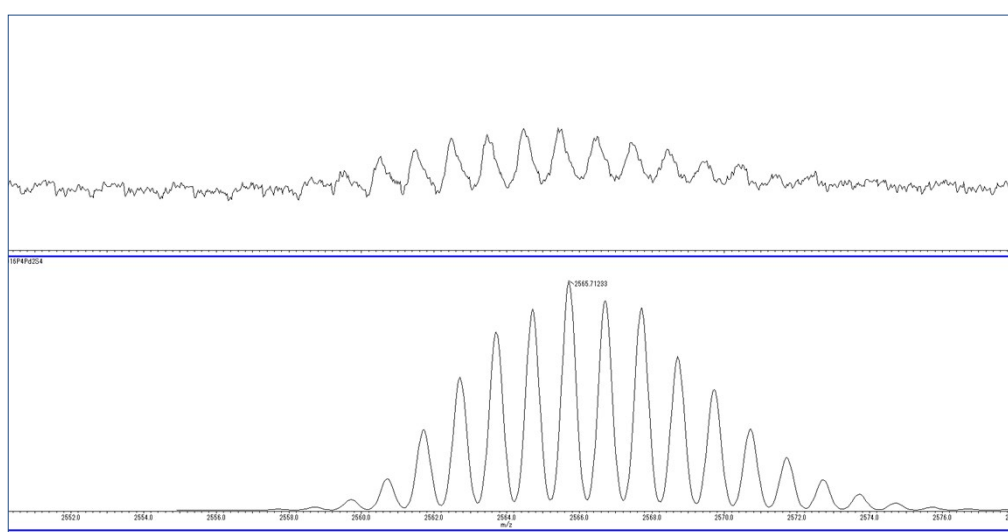

Fig. S10 ESI mass spectrum of cage 2 with suberate (up: obtained, down: calculated isotope pattern).

## 5. X-ray crystal structure analysis

### *cis*-5,15-dipyridyl-5',10,10',15',20,20'-hexamethylcalix[4]pyrrole

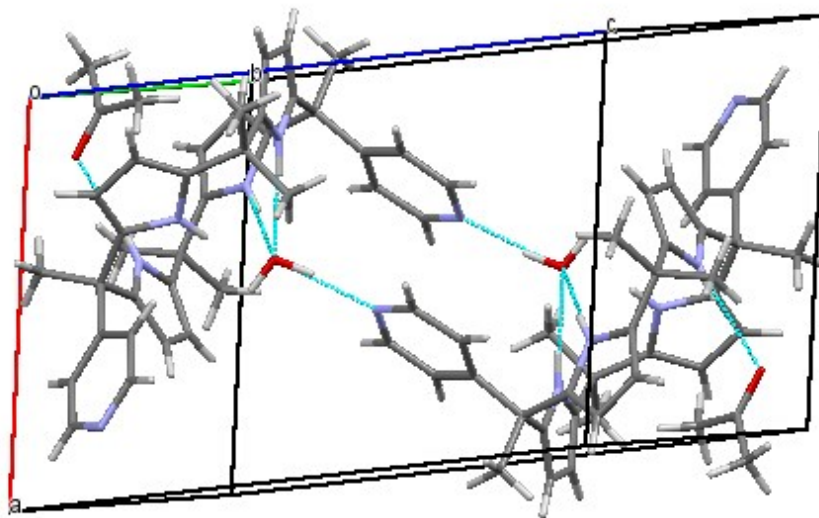

| Crystal data                       |                                                               |
|------------------------------------|---------------------------------------------------------------|
| Chemical formula                   | C <sub>39</sub> H <sub>46</sub> N <sub>6</sub> O <sub>2</sub> |
| <i>M</i> <sub>r</sub>              | 630.82                                                        |
| Crystal system, space group        | Triclinic, <i>P</i> <sup>-</sup> 1                            |
| Temperature (K)                    | 297                                                           |
| <i>a</i> , <i>b</i> , <i>c</i> (Å) | 9.931 (3), 10.822 (3), 16.924 (5)                             |
| α, β, γ (°)                        | 95.265 (5), 98.127 (4), 92.686 (5)                            |
| <i>V</i> (Å <sup>3</sup> )         | 1789.7 (8)                                                    |
| <i>Z</i>                           | 2                                                             |
| Radiation type                     | Mo <i>K</i> α                                                 |
| μ (mm <sup>-1</sup> )              | 0.07                                                          |
| Crystal size (mm)                  | 0.30 × 0.10 × 0.05                                            |
|                                    |                                                               |
| Data collection                    |                                                               |
| Absorption correction              | Numerical                                                     |

|                                                                                     |                    |
|-------------------------------------------------------------------------------------|--------------------|
| $T_{\min}, T_{\max}$                                                                | 0.914, 0.971       |
| No. of measured,<br>independent and<br>observed [ $I > 2\sigma(I)$ ]<br>reflections | 14840, 8100, 3528  |
| $R_{\text{int}}$                                                                    | 0.043              |
| $(\sin \theta/\lambda)_{\text{max}}$ ( $\text{\AA}^{-1}$ )                          | 0.649              |
| Refinement                                                                          |                    |
| $R[F^2 > 2\sigma(F^2)],$<br>$wR(F^2), S$                                            | 0.062, 0.207, 0.89 |
| No. of reflections                                                                  | 8100               |
| No. of parameters                                                                   | 432                |
| $\Delta_{\text{max}}, \Delta_{\text{min}}$ ( $e \text{\AA}^{-3}$ )                  | 0.30, -0.18        |

*trans*-5,15-dipyridyl-5',10,10',15',20,20'-hexamethylcalix[4]pyrrole

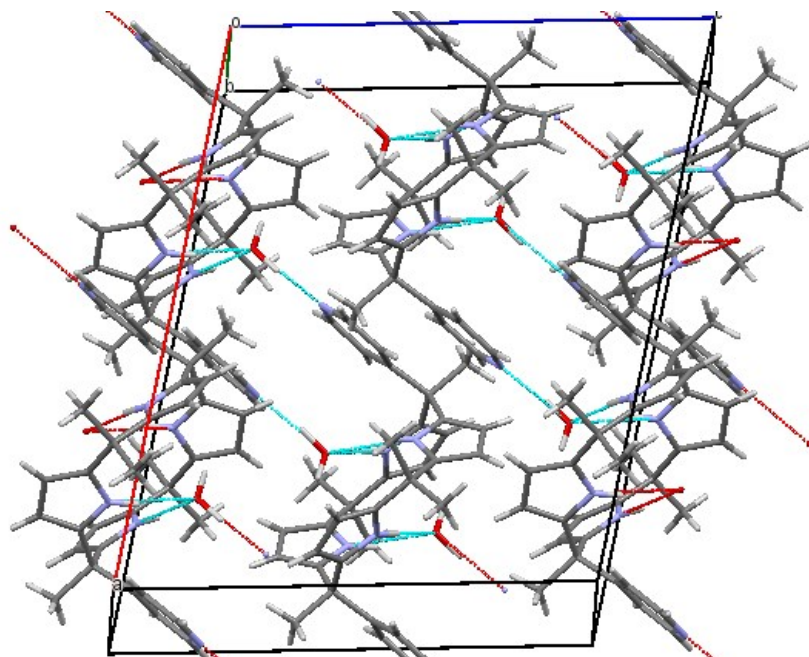

| Crystal data                       |                                                  |
|------------------------------------|--------------------------------------------------|
| Chemical formula                   | C <sub>36</sub> H <sub>40</sub> N <sub>6</sub> O |
| <i>M</i> <sub>r</sub>              | 572.74                                           |
| Crystal system, space group        | Monoclinic, <i>C2/c</i>                          |
| Temperature (K)                    | 296                                              |
| <i>a</i> , <i>b</i> , <i>c</i> (Å) | 17.908 (10), 12.767 (7), 14.894 (8)              |
| β (°)                              | 102.821 (10)                                     |
| <i>V</i> (Å <sup>3</sup> )         | 3321 (3)                                         |
| <i>Z</i>                           | 4                                                |
| Radiation type                     | Mo <i>K</i> α                                    |
| μ (mm <sup>-1</sup> )              | 0.07                                             |
| Crystal size (mm)                  | 0.20 × 0.20 × 0.20                               |
|                                    |                                                  |
| Data collection                    |                                                  |
| Absorption correction              | Multi-scan                                       |

|                                                                                     |                    |
|-------------------------------------------------------------------------------------|--------------------|
| $T_{\min}, T_{\max}$                                                                | 0.715, 1.000       |
| No. of measured,<br>independent and<br>observed [ $I > 2\sigma(I)$ ]<br>reflections | 13208, 3799, 2158  |
| $R_{\text{int}}$                                                                    | 0.058              |
| $(\sin \theta/\lambda)_{\text{max}}$ ( $\text{\AA}^{-1}$ )                          | 0.649              |
| Refinement                                                                          |                    |
| $R[F^2 > 2\sigma(F^2)],$<br>$wR(F^2), S$                                            | 0.086, 0.234, 1.13 |
| No. of reflections                                                                  | 3799               |
| No. of parameters                                                                   | 208                |
| $\Delta_{\text{max}}, \Delta_{\text{min}}$ ( $e \text{\AA}^{-3}$ )                  | 0.17, -0.18        |
